# Supplementary material
Source: Springer Nature journal article supplement (https://www.springermedizin.de/resource/supplementary/12875_2013_956_MOESM1_ESM.pdf/9435496)



Specific  
diagnosis

Biomedical  
tests

Primary care patient

Symptoms

Supplement: MOESM1 [file 9435496]
